# Supplementary material
Source: ML conference proceedings conference paper supplement (https://proceedings.neurips.cc/paper_files/paper/2011/hash/3cec07e9ba5f5bb252d13f5f431e4bbb-Abstract.html)
Supplement: Supplementary file [file 3cec07e9ba5f5bb252d13f5f431e4bbb-Supplemental.zip]

## A Derivation of the Minimax Forecaster

In this appendix, we outline how the Minimax Forecaster is derived, as well as its associated guarantees. This outline closely follows the exposition in [10, Chapter 8], to which we refer the reader for some of the technical derivations.

First, we note that the Minimax Forecaster as presented in [10] actually refers to a slightly different setup than ours, where the outcome space is  $\mathcal{Y} = \{0, 1\}$  and the prediction space is  $\mathcal{P} = [0, 1]$ , rather than  $\mathcal{Y} = \{-1, +1\}$  and  $\mathcal{P} = [-1, +1]$ . We will first derive the forecaster for the first setting, and then show how to convert it to the second setting.

Our goal is to find a predictor which minimizes the worst-case regret,

$$\max_{\mathbf{y} \in \{0,1\}^T} \left( L(\mathbf{p}, \mathbf{y}) - \inf_{\mathbf{f} \in \mathcal{F}} L(\mathbf{f}, \mathbf{y}) \right)$$

where  $\mathbf{p} = (p_1, \dots, p_T)$  is the prediction sequence.

For convenience, in the following we sometimes use the notation  $\mathbf{y}^t$  to denote a vector in  $\{0, 1\}^t$ . The idea of the derivation is to work backwards, starting with computing the optimal prediction at the last round  $T$ , then deriving the optimal prediction at round  $T-1$  and so on. In the last round  $T$ , the first  $T-1$  outcomes  $\mathbf{y}^{T-1}$  have been revealed, and we want to find the absolute prediction  $p_T$ . Since our goal is to minimize worst-case regret with respect to the absolute loss, we just need to compute  $p_T$  which minimizes

$$\max \left\{ L(\mathbf{p}^{T-1}, \mathbf{y}^{T-1}) + p_T - \inf_{\mathbf{f} \in \mathcal{F}} L(\mathbf{f}, \mathbf{y}^{T-1}0), L(\mathbf{p}^{T-1}, \mathbf{y}^{T-1}) + (1-p_T) - \inf_{\mathbf{f} \in \mathcal{F}} L(\mathbf{f}, \mathbf{y}^{T-1}1) \right\}.$$

In our setting, it is not hard to show that  $|\inf_{\mathbf{f} \in \mathcal{F}} L(\mathbf{f}, \mathbf{y}^{t-1}0) - \inf_{\mathbf{f} \in \mathcal{F}} L(\mathbf{f}, \mathbf{y}^{t-1}1)| \leq 1$  (see [10, Lemma 8.1]). Using this, we can compute the optimal  $p_T$  to be

$$p_T = \frac{1}{2} \left( A_T(\mathbf{y}^{T-1}1) - A_T(\mathbf{y}^{T-1}0) + 1 \right) \quad (5)$$

where  $A_T(\mathbf{y}^T) = -\inf_{\mathbf{f} \in \mathcal{F}} L(\mathbf{f}, \mathbf{y}^T)$ .

Having determined  $p_T$ , we can continue to the previous prediction  $p_{T-1}$ . This is equivalent to minimizing

$$\max \left\{ L(\mathbf{p}^{T-2}, \mathbf{y}^{T-2}) + p_{T-1} + A_{T-1}(\mathbf{y}^{T-2}0), L(\mathbf{p}^{T-2}, \mathbf{y}^{T-2}) + (1-p_{T-1}) - \inf_{\mathbf{f} \in \mathcal{F}} L(\mathbf{f}, \mathbf{y}^{T-2}1) \right\}$$

where

$$A_{t-1}(\mathbf{y}^{t-1}) = \min_{p_t \in [0,1]} \max \left\{ p_t - \inf_{\mathbf{f} \in \mathcal{F}} L(\mathbf{f}, \mathbf{y}^{t-1}0), (1-p_t) - \inf_{\mathbf{f} \in \mathcal{F}} L(\mathbf{f}, \mathbf{y}^{t-1}1) \right\}. \quad (6)$$

Note that by plugging in the value of  $p_T$  from Eq. (5), we also get the following equivalent formulation for  $A_{T-1}(\mathbf{y}^{T-1})$ :

$$A_{T-1}(\mathbf{y}^{T-1}) = \frac{1}{2} \left( A_T(\mathbf{y}^{T-1}0) + A_T(\mathbf{y}^{T-1}1) + 1 \right).$$

Again, it is possible to show that the optimal value of  $p_{T-1}$  is

$$p_{T-1} = \frac{1}{2} \left( A_{T-1}(\mathbf{y}^{T-2}1) - A_{T-1}(\mathbf{y}^{T-2}0) + 1 \right).$$

Repeating this procedure, one can show that at any round  $t$ , the minimax optimal prediction is

$$p_t = \frac{1}{2} \left( A_t(\mathbf{y}^{t-1}1) - A_t(\mathbf{y}^{t-1}0) + 1 \right) \quad (7)$$

where  $A_t$  is defined recursively as  $A_t(\mathbf{y}^T) = -\inf_{\mathbf{f} \in \mathcal{F}} L(\mathbf{f}, \mathbf{y}^T)$  and

$$A_{t-1}(\mathbf{y}^{t-1}) = \frac{1}{2} \left( A_t(\mathbf{y}^{t-1}0) + A_t(\mathbf{y}^{t-1}1) + 1 \right). \quad (8)$$

for all  $t$ .

At first glance, computing  $p_t$  from Eq. (7) might seem tricky, since it requires computing  $A_t(\mathbf{y}^t)$  whose recursive expansion in Eq. (8) involves exponentially many terms. Luckily, the recursive expansion has a simple structure, and it is not hard to show that

$$A_t(\mathbf{y}^t) = \frac{T-t}{2} - \frac{1}{2^T} \sum_{\mathbf{y} \in \{0,1\}^T} \left( \inf_{\mathbf{f} \in \mathcal{F}} L(\mathbf{f}, \mathbf{y}^t Y^{T-t}) \right) = \frac{T-t}{2} - \mathbb{E} \left[ \inf_{\mathbf{f} \in \mathcal{F}} L(\mathbf{f}, \mathbf{y}^t Y^{T-t}) \right] \quad (9)$$

where  $Y^{T-t}$  is a sequence of  $T-t$  i.i.d. Bernoulli random variables, which take values in  $\{0,1\}$  with equal probability. Plugging this into the formula for the minimax prediction in Eq. (7), we get that<sup>3</sup>

$$p_t = \frac{1}{2} \left( \mathbb{E} \left[ \inf_{\mathbf{f} \in \mathcal{F}} L(\mathbf{f}, \mathbf{y}^{t-1} 0 Y^{T-t}) - \inf_{\mathbf{f} \in \mathcal{F}} L(\mathbf{f}, \mathbf{y}^{t-1} 1 Y^{T-t}) \right] + 1 \right). \quad (10)$$

This prediction rule constitutes the Minimax Forecaster as presented in [10].

After deriving the algorithm, we turn to analyze its regret performance. To do so, we just need to note that  $A_0$  equals the worst-case regret —see the recursive definition at Eq. (6). Using the alternative explicit definition in Eq. (9), we get that the worst-case regret equals

$$\frac{T}{2} - \mathbb{E} \left[ \inf_{\mathbf{f} \in \mathcal{F}} \sum_{t=1}^T |f_t - Y_t| \right] = \mathbb{E} \left[ \sup_{\mathbf{f} \in \mathcal{F}} \sum_{t=1}^T \left( \frac{1}{2} - |f_t - Y_t| \right) \right] = \mathbb{E} \left[ \sup_{\mathbf{f} \in \mathcal{F}} \sum_{t=1}^T \left( f_t - \frac{1}{2} \right) \sigma_t \right]$$

where  $\sigma_t$  are i.i.d. Rademacher random variables (taking values of  $-1$  and  $+1$  with equal probability). Recalling the definition of Rademacher complexity, Eq. (2), we get that the regret is bounded by the Rademacher complexity of the shifted class, which is obtained from  $\mathcal{F}$  by taking every  $\mathbf{f} \in \mathcal{F}$  and replacing every coordinate  $f_t$  by  $f_t - 1/2$ .

Finally, it remains to show how to convert the forecaster and analysis above to the setting discussed in this paper, where the outcomes are in  $\{-1, +1\}$  rather than  $\{0, 1\}$  and the predictions are in  $[-1, +1]$  rather than  $[0, 1]$ . To do so, consider a learning problem in this new setting, with some class  $\mathcal{F}$ . For any vector  $\mathbf{y}$ , define  $\tilde{\mathbf{y}}$  to be the shifted vector  $(\mathbf{y} + \mathbf{1})/2$ , where  $\mathbf{1} = (1, \dots, 1)$  is the all-ones vector. Also, define  $\tilde{\mathcal{F}}$  to be the shifted class  $\tilde{\mathcal{F}} = \{(\mathbf{f} + \mathbf{1})/2 : \mathbf{f} \in \mathcal{F}\}$ . It is easily seen that  $L(\mathbf{f}, \mathbf{y}) = 2L(\tilde{\mathbf{f}}, \tilde{\mathbf{y}})$  for any  $\mathbf{f}, \mathbf{y}$ . As a result, if we look at the prediction  $p_t$  given by our forecaster in Eq. (3), then  $\tilde{p}_t = (p_t + 1)/2$  is the minimax optimal prediction given by Eq. (10) with respect to the class  $\tilde{\mathcal{F}}$  and the outcomes  $\tilde{\mathbf{y}}^T$ . So our analysis above applies, and we get that

$$\begin{aligned} \max_{\mathbf{y} \in \{-1, +1\}^T} \left( L(\mathbf{p}, \mathbf{y}) - \inf_{\mathbf{f} \in \mathcal{F}} L(\mathbf{f}, \mathbf{y}) \right) &= \max_{\tilde{\mathbf{y}} \in [0, 1]^T} 2 \left( L(\tilde{\mathbf{p}}, \tilde{\mathbf{y}}) - \inf_{\tilde{\mathbf{f}} \in \tilde{\mathcal{F}}} L(\tilde{\mathbf{f}}, \tilde{\mathbf{y}}) \right) \\ &= 2 \mathbb{E} \left[ \sup_{\tilde{\mathbf{f}} \in \tilde{\mathcal{F}}} \sum_{t=1}^T \left( \tilde{f}_t - \frac{1}{2} \right) \sigma_t \right] \\ &= \mathbb{E} \left[ \sup_{\mathbf{f} \in \mathcal{F}} \sum_{t=1}^T \sigma_t f_t \right] \end{aligned}$$

which is exactly the Rademacher complexity of the class  $\mathcal{F}$ .

## B Proof of Thm. 3

Let  $Y(t)$  denote the set of Bernoulli random variables chosen at round  $t$ . Let  $\mathbb{E}_{z_t}$  denote expectation with respect to  $z_t$ , conditioned on  $z_1, Y(1), \dots, z_{t-1}, Y(t-1)$  as well as  $Y(t)$ . Let  $\mathbb{E}_{Y(t)}$  denote the expectation with respect to the random drawing of  $Y(t)$ , conditioned on  $z_1, Y(1), \dots, z_{t-1}, Y(t-1)$ .

We will need two simple observations. First, by convexity of the loss function, we have that for any  $p_t, f_t, y_t$ ,  $\ell(p_t, y_t) - \ell(f_t, y_t) \leq (p_t - f_t) \partial_{p_t} \ell(p_t, y_t)$ . Second, by definition of  $r_t$  and

<sup>3</sup>This fact appears in an implicit form in [9] —see also [10, Exercise 8.4].

$z_t$ , we have that for any fixed  $p_t, f_t$ ,

$$\begin{aligned}
\frac{1}{\rho b}(p_t - f_t)\partial_{p_t}\ell(p_t, y_t) &= \frac{1}{b}(p_t - f_t)(1 - 2r_t) \\
&= \frac{1}{b}r_t(f_t - p_t) + \frac{1}{b}(1 - r_t)(p_t - f_t) \\
&= r_t(\tilde{f}_t - \tilde{p}_t) + (1 - r_t)(\tilde{p}_t - \tilde{f}_t) \\
&= r_t\left((1 - \tilde{p}_t) - (1 - \tilde{f}_t)\right) + (1 - r_t)\left((\tilde{p}_t + 1) - (\tilde{f}_t + 1)\right) \\
&= \mathbb{E}_{z_t}\left[|\tilde{p}_t - z_t| - |\tilde{f}_t - z_t|\right].
\end{aligned}$$

The last transition uses the fact that  $\tilde{p}_t, \tilde{f}_t \in [-1, +1]$ . By these two observations, we have

$$\sum_{t=1}^T \ell(p_t, y_t) - L(\mathbf{f}, \mathbf{y}) \leq \sum_{t=1}^T (p_t - f_t)\partial_{p_t}\ell(p_t, y_t) = \rho b \sum_{t=1}^T \mathbb{E}_{z_t}\left[|\tilde{p}_t - z_t| - |\tilde{f}_t - z_t|\right]. \quad (11)$$

Now, note that  $|\tilde{p}_t - z_t| - |\tilde{f}_t - z_t| - \mathbb{E}_{z_t}[|\tilde{p}_t - z_t| - |\tilde{f}_t - z_t|]$  for  $t = 1, \dots, T$  is a martingale difference sequence: for any values of  $z_1, Y(1), \dots, z_{t-1}, Y(t-1), Y(t)$  (which fixes  $\tilde{p}_t$ ), the conditional expectation of this expression over  $z_t$  is zero. Using Azuma's inequality, we can upper bound Eq. (11) with probability at least  $1 - \delta/2$  by

$$\rho b \sum_{t=1}^T \left(|\tilde{p}_t - z_t| - |\tilde{f}_t - z_t|\right) + \rho b \sqrt{8T \ln(2/\delta)}. \quad (12)$$

The next step is to relate Eq. (12) to  $\rho b \sum_{t=1}^T (|\mathbb{E}_{Y(t)}[\tilde{p}_t] - z_t| - |\tilde{f}_t - z_t|)$ . It might be tempting to appeal to Azuma's inequality again. Unfortunately, there is no martingale difference sequence here, since  $z_t$  is itself a random variable whose distribution is influenced by  $Y(t)$ . Thus, we need to turn to coarser methods. Eq. (12) can be upper bounded by

$$\rho b \sum_{t=1}^T \left(|\mathbb{E}_{Y(t)}[\tilde{p}_t] - z_t| - |\tilde{f}_t - z_t|\right) + \rho b \sum_{t=1}^T |\tilde{p}_t - \mathbb{E}_{Y(t)}[\tilde{p}_t]| + \rho b \sqrt{8T \ln(2/\delta)}. \quad (13)$$

Recall that  $\tilde{p}_t$  is an average over  $\eta T$  i.i.d. random variables, with expectation  $\mathbb{E}_{Y(t)}[\tilde{p}_t]$ . By Hoeffding's inequality, this implies that for any  $t = 1, \dots, T$ , with probability at least  $1 - \delta/2T$  over the choice of  $Y(t)$ ,  $|\tilde{p}_t - \mathbb{E}_{Y(t)}[\tilde{p}_t]| \leq \sqrt{2 \ln(2T/\delta)/(\eta T)}$ . By a union bound, it follows that with probability at least  $1 - \delta/2$  over the choice of  $Y(1), \dots, Y(T)$ ,

$$\sum_{t=1}^T |\tilde{p}_t - \mathbb{E}_{Y(t)}[\tilde{p}_t]| \leq \sqrt{\frac{2T \ln(2T/\delta)}{\eta}}.$$

Combining this with Eq. (13), we get that with probability at least  $1 - \delta$ ,

$$\rho b \sum_{t=1}^T \left(|\mathbb{E}_{Y(t)}[\tilde{p}_t] - z_t| - |\tilde{f}_t - z_t|\right) + \rho b \sqrt{\frac{2T \ln(2T/\delta)}{\eta}} + \rho b \sqrt{8T \ln(2/\delta)}. \quad (14)$$

Finally, by definition of  $\tilde{p}_t = p_t/b$ , we have

$$\mathbb{E}_{Y(t)}[\tilde{p}_t] = \mathbb{E}_{Y(t)}\left[\inf_{\mathbf{f} \in \mathcal{F}} L\left(\mathbf{f}, z_1 \dots z_{t-1} (-1) Y_{t+1} \dots Y_T\right) - \inf_{\mathbf{f} \in \mathcal{F}} L\left(\mathbf{f}, z_1 \dots z_{t-1} 1 Y_{t+1} \dots Y_T\right)\right].$$

This is exactly the Minimax Forecaster's prediction at round  $t$ , with respect to the sequence of outcomes  $z_1, \dots, z_{t-1} \in \{-1, +1\}$ , and the class  $\tilde{\mathcal{F}} := \{\mathbf{f} : \mathbf{f} \in \mathcal{F}\} \subseteq [-1, 1]^T$ . Therefore, using Thm. 1, we can upper bound Eq. (14) by

$$\rho b \mathcal{R}_T(\tilde{\mathcal{F}}) + \rho b \sqrt{\frac{2T \ln(2T/\delta)}{\eta}} + \rho b \sqrt{8T \ln(2/\delta)}.$$

By definition of  $\tilde{\mathcal{F}}$  and Rademacher complexity, it is straightforward to verify that  $\mathcal{R}_T(\tilde{\mathcal{F}}) = \frac{1}{b} \mathcal{R}_T(\mathcal{F})$ . Using that to rewrite the bound, and slightly simplifying for readability, the result stated in the theorem follows.

## C Proof of Lemma 1

The proof assumes that the infimum and supremum of certain functions over  $\mathcal{Y}, \mathcal{F}$  are attainable. If not, the proof can be easily adapted by finding attainable values which are  $\epsilon$ -close to the infimum or supremum, and then taking  $\epsilon \rightarrow 0$ .

For the purpose of contradiction, suppose there exists a strategy for the adversary and a round  $r \leq T$  such that at the end of round  $r$ , the forecaster suffers a regret  $G' > G$  with probability larger than  $\delta$ . Consider the following modified strategy for the adversary: the adversary plays according to the aforementioned strategy until round  $r$ . It then computes

$$f^* = \operatorname{argmin}_{f \in \mathcal{F}} \sum_{t=1}^r \ell(f_t, y_t) .$$

At all subsequent rounds  $t = r + 1, r + 2, \dots, T$ , the adversary chooses

$$y_t^* = \operatorname{argmax}_{y \in \mathcal{Y}} \inf_{p \in \mathcal{P}} (\ell(p, y) - \ell(f_t^*, y)) .$$

By the assumption on the loss function,

$$\ell(p_t, y_t^*) - \ell(f_t^*, y_t^*) \geq \inf_{p \in \mathcal{P}} (\ell(p, y_t^*) - \ell(f_t^*, y_t^*)) = \sup_{y \in \mathcal{Y}} \inf_{p \in \mathcal{P}} (\ell(p, y) - \ell(f_t^*, y)) \geq 0 .$$

Thus, the regret over all  $T$  rounds, with respect to  $f^*$ , is

$$\sum_{t=1}^r (\ell(p_t, y_t) - \ell(f_t^*, y_t)) + \sum_{t=r+1}^T (\ell(p_t, y_t^*) - \ell(f_t^*, y_t^*)) \geq \sum_{t=1}^r \ell(p_t, y_t) - \inf_{f \in \mathcal{F}} \sum_{t=1}^r \ell(f_t, y_t) + 0$$

which is at least  $G'$  with probability larger than  $\delta$ . On the other hand, we know that the learner's regret is at most  $G$  with probability at least  $1 - \delta$ . Thus we have a contradiction and the proof is concluded.
